# Supplementary material for: Highly cytotoxic vanadium(v) complexes of salan ligands; insights on the role of hydrolysis
Source: Royal Society of Chemistry journal article supplement (doi:10.1039/c2dt11514j), 2012-01-01
Supplement: c2dt11514j.pdf [file c2dt11514j.pdf]

# Highly Cytotoxic Vanadium(V) Complexes of Salan Ligands; Insights on the Role of Hydrolysis

## Supporting Information

**Lilia Reytman,<sup>a</sup> Ori Braitbard<sup>b</sup> and Edit Y. Tshuva<sup>a,\*</sup>**

<sup>a</sup> *Institute of Chemistry, The Hebrew University of Jerusalem, 91904, Jerusalem, Israel.*

*Fax: +972 2 6584282*

*E-mail: [tshuva@chem.ch.huji.ac.il](mailto:tshuva@chem.ch.huji.ac.il)*

<sup>b</sup> *Department of Cell and Developmental Biology, Alexander Silberman Institute of Life Sciences,  
The Hebrew University of Jerusalem, 91904, Jerusalem, Israel.*

## Cytotoxicity Measurements on OVCAR-1 Cells

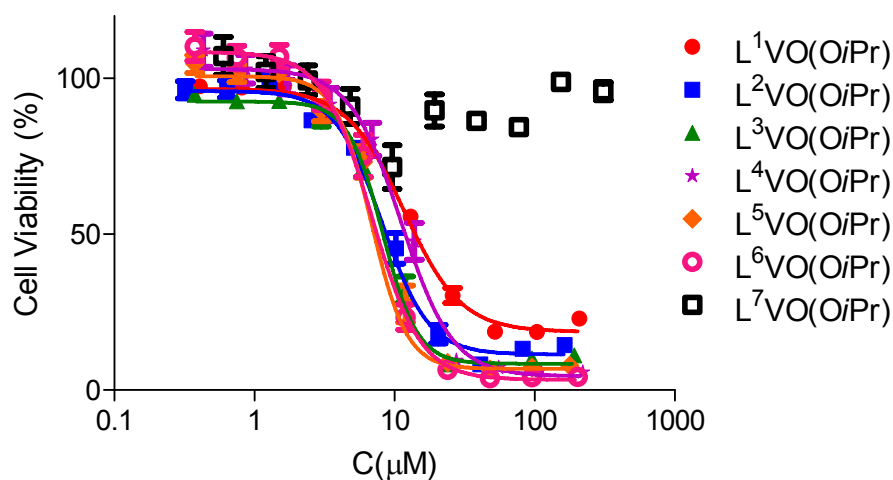

**Figure 1.** Dependence of OVCAR-1 cell viability on administered concentration of L<sup>1-7</sup>VO(OiPr) following 3 days incubation obtained by the MTT assay

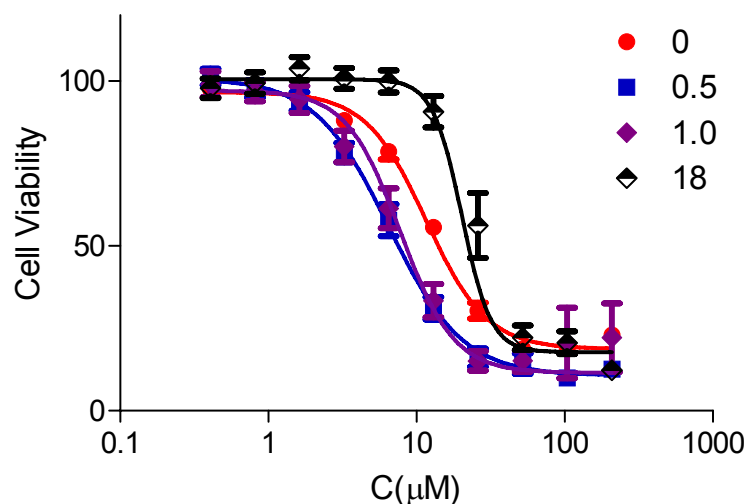

**Figure 2.** Dependence of OVCAR-1 cell viability on administered concentration of L<sup>1</sup>VO(OiPr) following pre-incubation in aqueous medium for varying periods (given in hours) prior to cell addition and 3 days incubation with cells, obtained by MTT assay

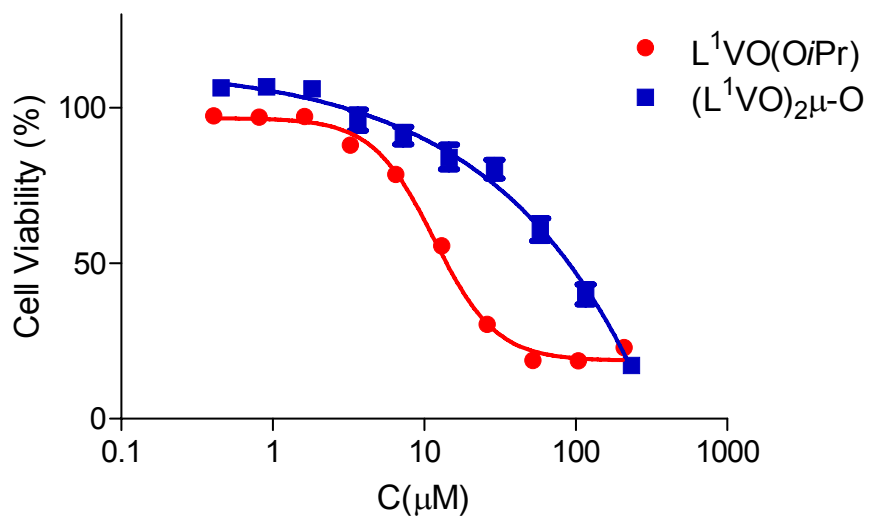

**Figure 3.** Dependence of OVCAR-1 cell viability on administered concentration of L<sup>1</sup>VO(OiPr) and its hydrolysis product (L<sup>1</sup>VO)<sub>2</sub>μ-O following 3 days incubation obtained by the MTT assay

### **Apoptosis vs. Necrosis Measurements**

Apoptosis was analyzed using the MEBCYTOR Apoptosis kit (MBL, Japan). 50,000 cells were seeded into 6 well plate. Following 24 hours, the cells were exposed to the compound and incubated for additional 24 hours. Cells were trypsinized and washed twice with PBS, resuspended in 85  $\mu$ L of binding buffer and 10  $\mu$ L of annexin V-FITC and 5  $\mu$ L of propidium iodide were added. Cells were mixed well and incubated for 15 minutes in the dark. 400  $\mu$ l of binding buffer was added and cellanalysis was performed on a Becton-Dickinson Excalibur Fluorescence Activated Cell Sorter using a single laser emitting excitation light at 488 nm. FloJo program was used for peak fluorescence quantification.

See Figure on the following page.

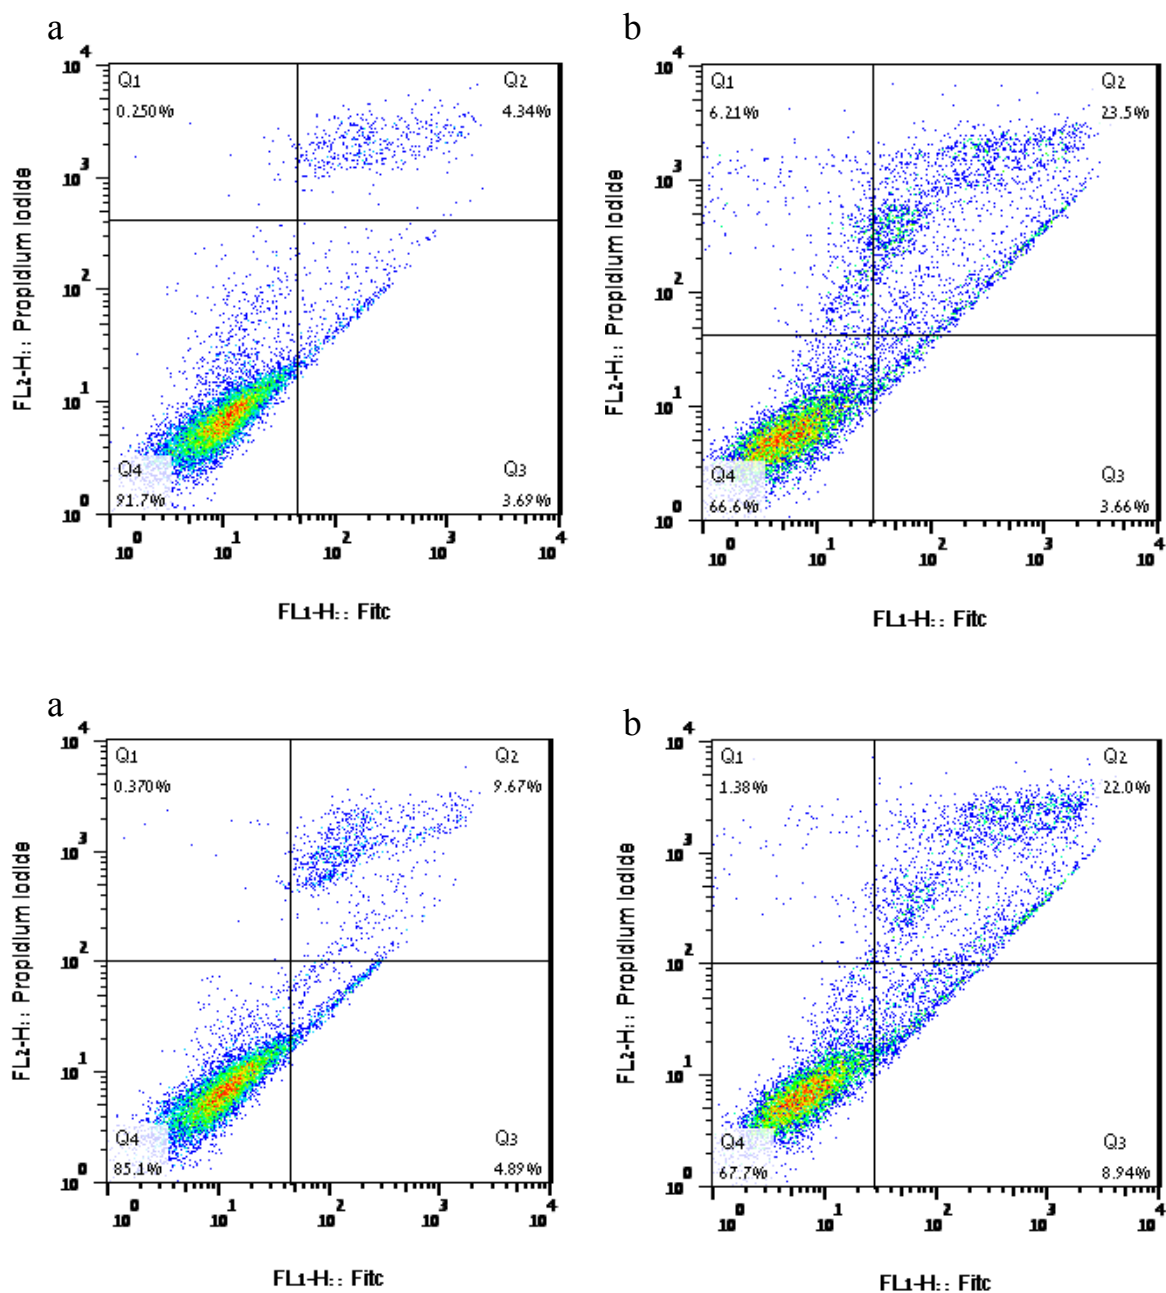

**Figure 4.** FACS analysis of apoptosis vs. necrosis showing propidium iodide against Annexin expression of HT-29 (top) and OVCAR-1 (bottom) cells that were (a) untreated or (b) treated with 100 μM of L<sup>1</sup>VO(OiPr) and incubated for 24 hours

## Cyclic Voltammetry Measurements

Cyclic voltammetry measurements were performed at room temperature on a  $\mu$ Autolab type III potentiostat and analyzed with GPES software. Tetrabutylammonium hexafluorophosphate (TBAPF6) (0.1 M), used as supporting electrolyte, was obtained from Sigma Inc. An electrochemical three-electrode cell was used with a platinum electrode as the working electrode, a platinum wire as the counter electrode and AgBr electrode as the reference electrode. The scan was performed at 0.2 v/s scan rate, in a THF solution containing 2 mM of the studied complexes.

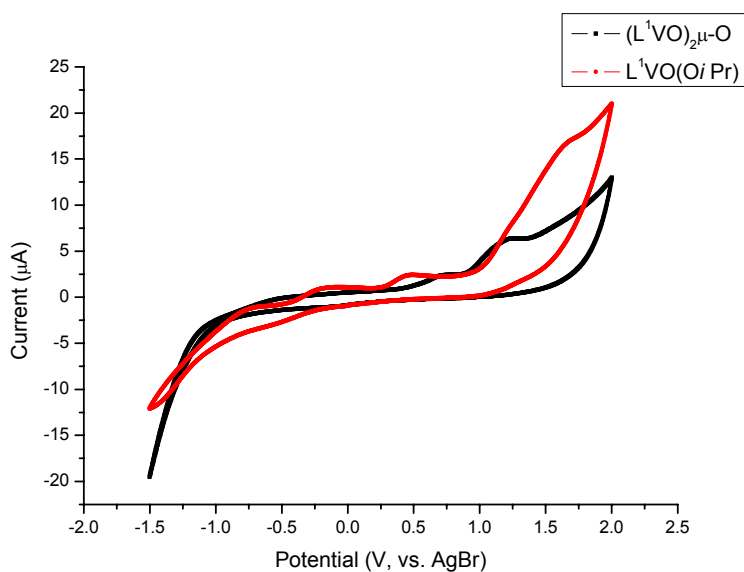

**Figure 5.** Cyclic voltammetry of  $L^1VO(OiPr)$  and  $(L^1VO)_2\mu-O$  in a THF solution
